# Supplementary material
Source: PubMed Central journal article supplement (PMC8319214)
Supplement: NIHMS1664498-supplement-1.pdf [file NIHMS1664498-supplement-1.pdf]

## Appendices

Supplemental Materials Table 1. Sample demographic characteristics

| Variable                  | Full Sample  | Control      | Breath Awareness | Loving-kindness | Gratitude    | <i>p</i> |
|---------------------------|--------------|--------------|------------------|-----------------|--------------|----------|
| <b>Race/Ethnicity (%)</b> |              |              |                  |                 |              |          |
| Asian                     | 5.56         | 5.13         | 8.11             | 7.14            | 2.27         |          |
| Black                     | 4.32         | 5.13         | 2.70             | 4.76            | 4.55         |          |
| Latinx                    | 4.32         | 2.56         | 2.70             | 2.38            | 9.09         |          |
| Multiracial               | 5.56         | 7.69         | 0.00             | 7.14            | 6.82         |          |
| Not reported              | 5.56         | 5.13         | 2.70             | 4.76            | 9.09         |          |
| White                     | 74.69        | 74.36        | 83.78            | 73.81           | 68.18        | .460     |
| <b>Gender (%)</b>         |              |              |                  |                 |              |          |
| Male                      | 36.42        | 35.9         | 37.84            | 28.57           | 43.18        |          |
| Female                    | 63.58        | 64.1         | 62.16            | 71.43           | 56.82        | .574     |
| <b>Meditation (%)</b>     |              |              |                  |                 |              |          |
| No                        | 83.33        | 87.18        | 83.78            | 80.95           | 81.82        |          |
| Yes                       | 16.67        | 12.82        | 16.22            | 19.05           | 18.18        | .884     |
| <b>Age (mean [SD])</b>    | 19.31 (0.75) | 19.20 (0.72) | 19.39 (0.77)     | 19.36 (0.77)    | 19.30 (0.75) | .690     |

Note: Meditation = practiced meditation in the past month; *p* = *p*-values from one-way analysis of variance comparing groups at baseline.

## BRIEF TRAINING AND WORKING MEMORY

Supplemental Materials Table 2. Missing data accounting

|                                | Control (n = 39)      | Breath Awareness (n = 37)                              | Loving-kindness (n = 42) | Gratitude (n = 44)                                                                      |
|--------------------------------|-----------------------|--------------------------------------------------------|--------------------------|-----------------------------------------------------------------------------------------|
| Missing pre-test OSPAN         | 1                     | 2                                                      | 2                        | 4                                                                                       |
| Missing pre-test OSPAN reason  | Accuracy <85% (n = 1) | Accuracy <85% (n = 2)                                  | Accuracy <85% (n = 2)    | Fell asleep during task (n = 1), Accuracy <85% (n = 3)                                  |
| Did not complete CPT           | 8                     | 2                                                      | 2                        | 6                                                                                       |
| Missing post-test OSPAN        | 4                     | 5                                                      | 4                        | 7                                                                                       |
| Missing post-test OSPAN reason | Accuracy <85% (n = 4) | Adverse reaction to CPT (n = 3), Accuracy <85% (n = 2) | Accuracy <85% (n = 4)    | Fell asleep at baseline (n = 1), Adverse reaction to CPT (n = 2), Accuracy <85% (n = 4) |

Note: OSPAN = Operation Span task; CPT = cold pressor test; Accuracy = accuracy solving mathematical operations in OSPAN. Typical adverse reaction to CPT was becoming “dizzy,” with one participant fainting.

## BRIEF TRAINING AND WORKING MEMORY

### Supplemental Materials Table 3. Syntax for multiple imputation model

```
library(jomo)
library(mitools)
library(mice)

imp10<-jomo1(df[,c("Ospan1Total","Ospan2Total","CPT_complete",
  "PANAS.neg.1","PANAS.neg.3",
  "PANAS.pos.1","PANAS.pos.3",
  "gender","age.years","white","med.recent",
  "Condition")],
  nimp=10)
outjomo<-subset(imp10,Imputation>0)
mi_list <- imputationList(split(outjomo, outjomo$Imputation))
mi_results <- with(mi_list, lm(Ospan2Total ~ Ospan1Total + Condition))
summary(pool(as.mira(mi_results)))

outjomo<-subset(imp10,Imputation>0 & !Condition=="CT")
mi_list <- imputationList(split(outjomo, outjomo$Imputation))
mi_results <- with(mi_list, lm(Ospan2Total ~ Ospan1Total + Condition))
summary(pool(as.mira(mi_results)))
```

## BRIEF TRAINING AND WORKING MEMORY

Supplemental Materials Table 4. Linear model predicting post-stressor OSPAN in the full sample with control as reference group

| Variable         | <i>B</i> | SE   | <i>t</i> | <i>p</i>  |
|------------------|----------|------|----------|-----------|
| (Intercept)      | 23.72    | 4.11 | 5.77     | < .001*** |
| Baseline OSPAN   | 0.66     | 0.06 | 10.44    | < .001*** |
| Breath Awareness | -4.08    | 2.04 | -2.01    | .047*     |
| Loving-kindness  | 0.92     | 1.95 | 0.47     | .638      |
| Gratitude        | 0.19     | 1.97 | 0.09     | .925      |

Note: *B* = unstandardized coefficient; SE = standard error; *t* = *t*-value; *p* = *p*-value; OSPAN = Operation Span.

\**p* < .050, \*\**p* < .010, \*\*\**p* < .001

## BRIEF TRAINING AND WORKING MEMORY

Supplemental Materials Table 5. Linear model predicting post-stressor OSPAN in the full sample with breath awareness as reference group

| Variable        | <i>B</i> | SE   | <i>t</i> | <i>p</i>  |
|-----------------|----------|------|----------|-----------|
| (Intercept)     | 19.68    | 4.95 | 3.97     | < .001*** |
| Baseline OSPAN  | 0.66     | 0.08 | 8.46     | < .001*** |
| Loving-kindness | 5.00     | 2.14 | 2.34     | .021*     |
| Gratitude       | 4.27     | 2.15 | 1.98     | .050*     |

Note: *B* = unstandardized coefficient; SE = standard error; *t* = *t*-value; *p* = *p*-value; OSPAN = Operation Span. Control group omitted from model.

\**p* < .050, \*\**p* < .010, \*\*\**p* < .001

## BRIEF TRAINING AND WORKING MEMORY

Supplemental Materials Table 6. Linear model predicting post-stressor OSPAN in cold pressor test completers with control as reference group

| Variable         | <i>B</i> | SE   | <i>t</i> | <i>p</i>  |
|------------------|----------|------|----------|-----------|
| (Intercept)      | 27.52    | 4.62 | 5.95     | < .001*** |
| Baseline OSPAN   | 0.61     | 0.07 | 8.62     | < .001*** |
| Breath Awareness | -5.16    | 2.2  | -2.35    | .020*     |
| Loving-kindness  | 0.09     | 2.13 | 0.04     | .967      |
| Gratitude        | -0.69    | 2.19 | -0.32    | .752      |

Note: *B* = unstandardized coefficient; SE = standard error; *t* = *t*-value; *p* = *p*-value; OSPAN = Operation Span.

\**p* < .050, \*\**p* < .010, \*\*\**p* < .001

## BRIEF TRAINING AND WORKING MEMORY

Supplemental Materials Table 7. Linear model predicting post-stressor OSPAN in cold pressor test completers with breath awareness as reference group

| Variable        | <i>B</i> | SE   | <i>t</i> | <i>p</i>  |
|-----------------|----------|------|----------|-----------|
| (Intercept)     | 22.86    | 5.46 | 4.18     | < .001*** |
| Baseline OSPAN  | 0.61     | 0.09 | 6.99     | < .001*** |
| Loving-kindness | 5.25     | 2.17 | 2.41     | .018*     |
| Gratitude       | 4.46     | 2.24 | 1.99     | .049*     |

Note: *B* = unstandardized coefficient; SE = standard error; *t* = *t*-value; *p* = *p*-value; OSPAN = Operation Span. Control group omitted from model.

\**p* < .050, \*\**p* < .010, \*\*\**p* < .001

## BRIEF TRAINING AND WORKING MEMORY

Supplemental Materials Table 8. Linear model predicting post-stressor OSPAN in full sample with missing data replaced using multiple imputation with control as reference group

| Variable         | <i>B</i> | SE   | <i>t</i> | <i>p</i>  |
|------------------|----------|------|----------|-----------|
| (Intercept)      | 22.27    | 4.25 | 5.24     | < .001*** |
| Baseline OSPAN   | 0.69     | 0.06 | 10.61    | < .001*** |
| Breath Awareness | -4.78    | 2.07 | -2.31    | .023*     |
| Loving-kindness  | 0.73     | 2    | 0.37     | .715      |
| Gratitude        | -0.16    | 2.03 | -0.08    | .936      |

Note: *B* = unstandardized coefficient; SE = standard error; *t* = *t*-value; *p* = *p*-value; OSPAN = Operation Span.

\**p* < .050, \*\**p* < .010, \*\*\**p* < .001



## BRIEF TRAINING AND WORKING MEMORY

Supplemental Materials Table 9. Linear model predicting post-stressor OSPAN in full sample with missing data replaced using multiple imputation with control as reference group

| Variable        | <i>B</i> | SE   | <i>t</i> | <i>p</i>  |
|-----------------|----------|------|----------|-----------|
| (Intercept)     | 16.72    | 4.77 | 3.50     | .001**    |
| Baseline OSPAN  | 0.70     | 0.08 | 9.11     | < .001*** |
| Loving-kindness | 5.52     | 2.15 | 2.57     | .012*     |
| Gratitude       | 4.63     | 2.14 | 2.17     | .033*     |

Note: *B* = unstandardized coefficient; SE = standard error; *t* = *t*-value; *p* = *p*-value; OSPAN = Operation Span. Control group omitted from model.

\**p* < .050, \*\**p* < .010, \*\*\**p* < .001

## BRIEF TRAINING AND WORKING MEMORY

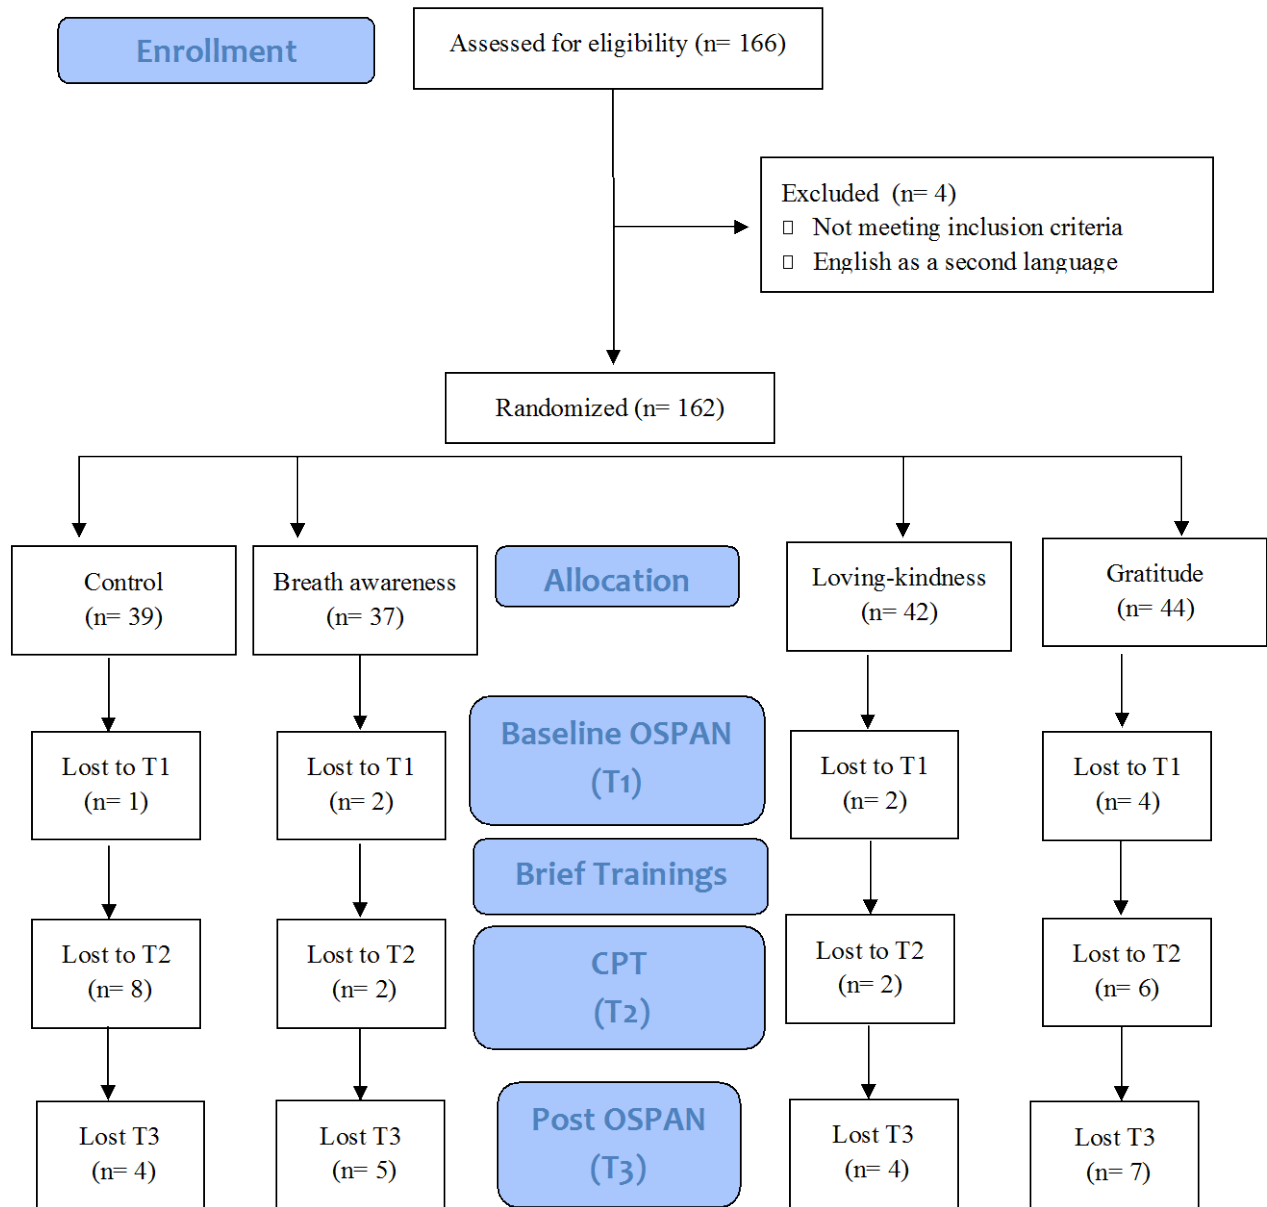

Supplemental Materials Figure 1. CONSORT flow diagram. Note that primary models included all participants with available pre- and post-stressor Operation Span (OSPAN) data, regardless of cold pressor test (CPT) completion. Analyzed sample sizes for primary linear models were 35, 31, 37, and 36 for control, breath awareness, loving-kindness, and gratitude respectively. See Supplemental Materials Table 2 for additional details regarding the cause of missing data.
